# Supplementary material for: Response prediction of hepatocellular carcinoma undergoing transcatheter arterial chemoembolization: unlocking the potential of CT texture analysis through nested decision tree models
Source: PubMed Central journal article supplement (PMC8128820; doi:10.1007/s00330-020-07511-3), 2020-12-03
Supplement: 330_2020_7511_MOESM1_ESM.pdf [file 330_2020_7511_MOESM1_ESM.pdf]

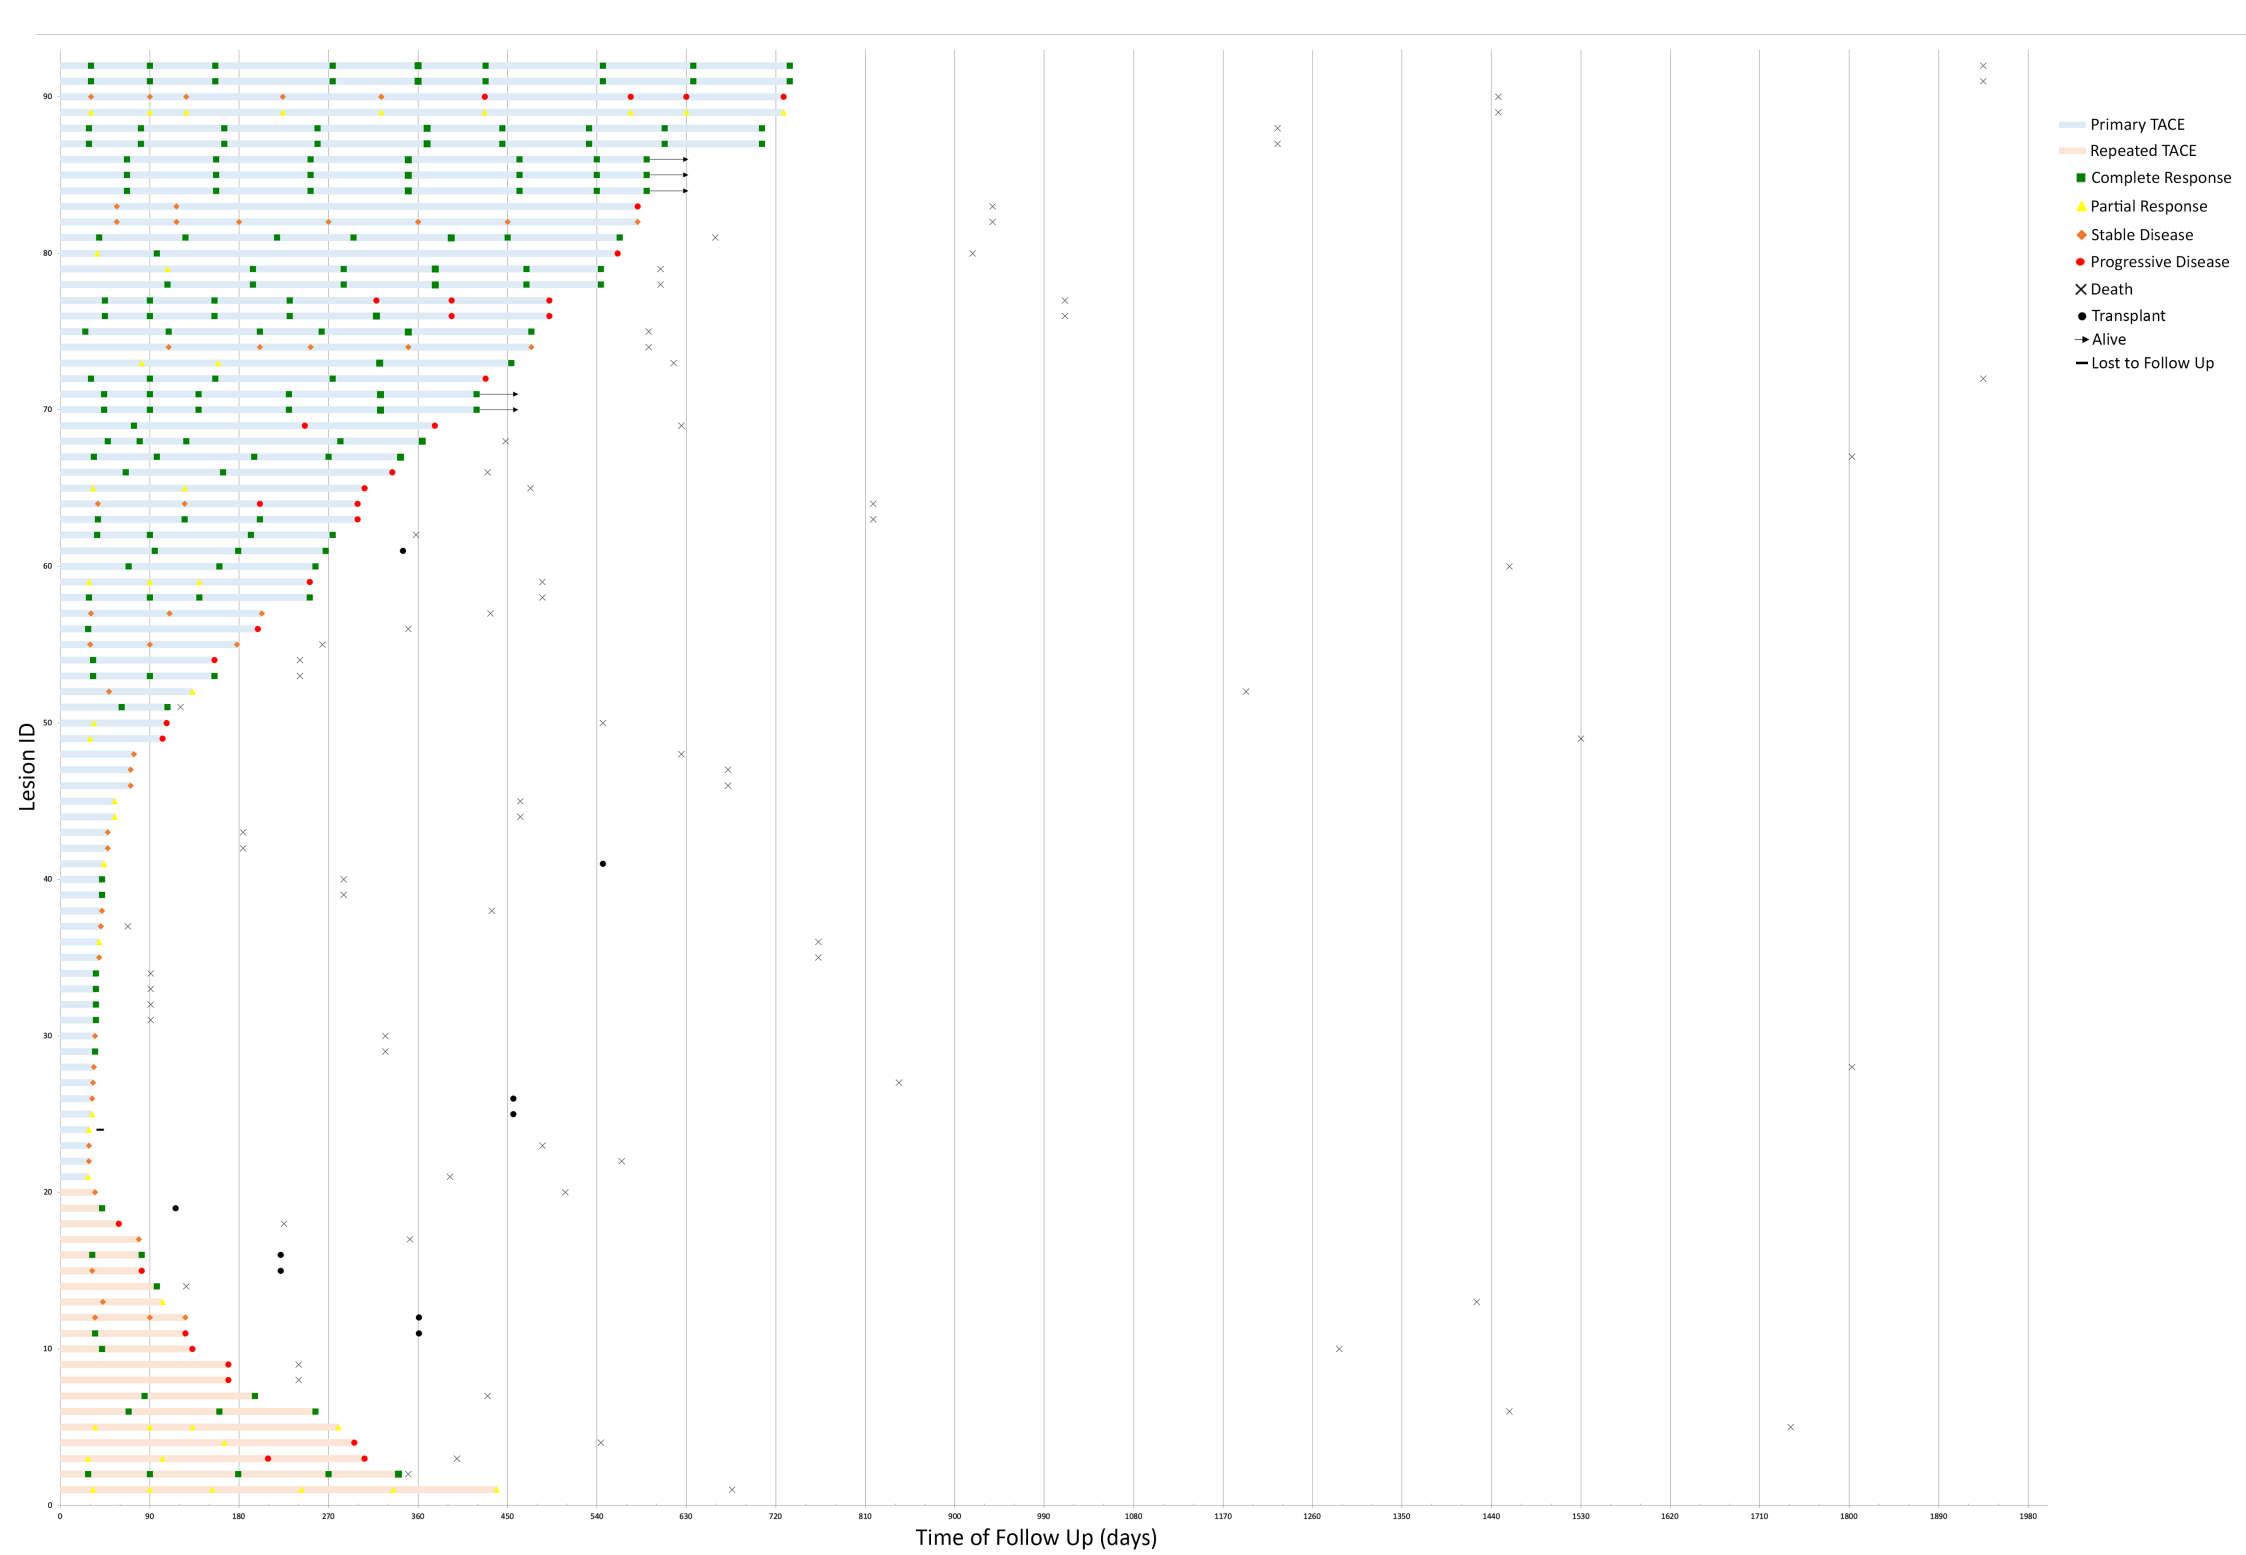

Swimmer plot depicting the course of each lesion over time (in days) and response to TACE according to mRECIST 1.1 criteria at the respective follow up timepoints. Blue bars represent course of lesions after primary TACE, orange bars depict evolution of lesions which underwent repeated TACE. TACE = Transcatheter arterial chemoembolization.
